# Supplementary material for: TBK1 and IKKε act like an OFF switch to limit NLRP3 inflammasome pathway activation
Source: PubMed Central journal article supplement — Proc Natl Acad Sci U S A. 2021 Sep 13;118(38):e2009309118. doi: 10.1073/pnas.2009309118 (PMC8463895; doi:10.1073/pnas.2009309118), 2021-09-13
Supplement: pnas.2009309118.sapp.pdf [file pnas.2009309118.sapp.pdf]

## KEY RESOURCES TABLE

| REAGENT or RESOURCE                           | SOURCE                     | IDENTIFIER                           |
|-----------------------------------------------|----------------------------|--------------------------------------|
| <b>Antibodies</b>                             |                            |                                      |
| Mouse caspase-1 (casper-1) antibody           | AdipoGen                   | AG-20B-0042-C100;<br>RRID:AB_2490248 |
| Rabbit monoclonal GAPDH (14C10) antibody      | CST                        | 2118S;<br>RRID: AB_561053            |
| Mouse IL-1 $\beta$ antibody                   | R&D Systems                | AF-401-NA;<br>RRID: AB_354347        |
| Mouse NLRP3 (Cryo-2) antibody                 | Caltag Medsystems          | AG-20B-0014-C100                     |
| Mouse NLRP3 (NALPY-3b) antibody               | Enzo Life Sciences         | ALX-804-819                          |
| Mouse IgG1 Isotype control                    | Enzo Life Sciences         | ADI-SAB-600-0050                     |
| Rabbit TBK1 antibody                          | CST                        | 3504;<br>RRID: AB_2255663            |
| Rabbit phospho-TBK1 S172 antibody             | CST                        | 5483T;<br>RRID:AB_10693472           |
| Rabbit AKT                                    | CST                        | 2938S;<br>RRID:AB_915788             |
| Rabbit phospho-AKT S473                       | CST                        | 4060S;<br>RRID:AB_2315049            |
| Rabbit phospho-AKT substrate                  | CST                        | 9614S;<br>RRID: AB_331810            |
| Mouse PP2A catalytic subunit $\alpha$         | BD Biosciences             | 610556;<br>RRID:AB_397910            |
| Rabbit GAPDH antibody                         | CST                        | 2118;<br>RRID:AB_561053              |
| Mouse tubulin antibody                        | Sigma                      | T5168;<br>RRID:AB_477579             |
| ASC                                           | Santa Cruz Biotechnologies | sc-22514-R                           |
| Rabbit NEK7 antibody                          | Abcam                      | ab133514                             |
| Mouse actin antibody                          | CST                        | 3700;<br>RRID: AB_2242334            |
| Mouse HA antibody                             | Merck                      | 05-904;<br>RRID: AB_417380           |
| Rabbit FLAG antibody                          | Sigma Aldrich              | F7425-2MG<br>RRID:AB_439687          |
| <b>Flow Cytometry Antibodies and Reagents</b> |                            |                                      |

|                                                                              |                       |                                      |
|------------------------------------------------------------------------------|-----------------------|--------------------------------------|
| TruStain fcX™ (anti-mouse CD16/32)                                           | Biolegend             | 101320<br>RRID:AB_1574975            |
| CD3-APC Cy7 (anti-mouse)                                                     | Biolegend             | 100221<br>RRID:AB_2057374            |
| CD19-APCCy7(anti-mouse)                                                      | Biolegend             | 115530<br>RRID:AB_830707             |
| CD11c-APC (anti-mouse)                                                       | Biolegend             | 117309<br>RRID:AB_313778             |
| CD11b-BV785                                                                  | Biolegend             | 101243<br>RRID:AB_2561373            |
| LIVE/DEAD® Fixable Near-IR Dead Cell Stain Kit, for 633 or 635 nm excitation | Fisher                | L10119                               |
| 16% Formaldehyde (w/v), Methanol-free-10 x                                   | Fisher                | 28908                                |
| <b>Biological Samples</b>                                                    |                       |                                      |
| Human blood                                                                  | NHS Blood Bank Oxford | N/A                                  |
| <b>Chemicals, Peptides, and Recombinant Proteins</b>                         |                       |                                      |
| Recombinant M-CSF                                                            | Immunotools           | 11343118                             |
| E.Coli LPS K12 ultrapure                                                     | Invivogen             | tIrl-pekIps                          |
| E. Coli LPS 055:B5 (Figure 3 only)                                           | Sigma Aldrich         | L2637                                |
| E. Coli LPS O111:B4 (Figure 2 and 4, where indicated)                        | Sigma Aldrich         | L4391                                |
| Zymosan                                                                      | Invivogen             | tIrl-zyn;<br>CAS:58856-93-2          |
| Pam3CSK4                                                                     | Invivogen             | tIrl-pms;<br>CAS:112208-00-1         |
| Poly(I:C)                                                                    | Sigma Aldrich         | P1530-25mg;<br>CAS:42424-50-0        |
| R837                                                                         | Invivogen             | tIrl-imqs;<br>CAS: 99011-78-6        |
| MSU                                                                          | Invivogen             | TIrl-msu                             |
| Nigericin                                                                    | Sigma Aldrich         | N7143-5MG;<br>CAS:28643-80-3         |
| Nigericin (Figure 3 only)                                                    | Sigma Aldrich         | SML1779                              |
| Okadaic acid (Figure 3 only)                                                 | Tocris                | 1136;<br>CAS: 78111-17-8             |
| Okadaic acid (PP2A inh 1)                                                    | Cambridge Bioscience  | 10011490-25ug-CAY;<br>CAS:78111-17-8 |
| Okadaic acid (PP2A inh 2)                                                    | Sigma Aldrich         | 495609-25UG;<br>CAS:78111-17-8       |

|                                                              |                                |                                 |
|--------------------------------------------------------------|--------------------------------|---------------------------------|
| Okadaic acid (PP2A inh 3)                                    | Sigma Aldrich                  | 495604-25UG;<br>CAS:78111-17-8  |
| LB-100                                                       | Cambridge Bioscience           | L0400-1 mg;<br>CAS:1026680-07-8 |
| VX-765 (Caspase-1 inhibitor)                                 | Merck                          | 5313720001                      |
| FuGene                                                       | Promega                        | E2311                           |
| UltraPure Flagellin from Salmonella typhimurium              | Invivogen                      | tlrl-epstflfa-5                 |
| Calf-thymus DNA                                              | Sigma Aldrich                  | D4522-5mg                       |
| HEPES (for transfection mix for retroviral transduction)     | Fisher                         | 15630056                        |
| Polybrene (for transfection mix for retroviral transduction) | Merck                          | TR-1003-G;<br>CAS:28728-55-4    |
| DSS (Disuccinimidyl suberate) Crosslinking reagent           | Thermofisher                   | 21655                           |
| DBK-1154                                                     | Obtained from Michael Ohlmeyer | N/A                             |
| ATP                                                          | Sigma Aldrich                  | A2383; CAS:34369-07-8           |
| Hoechst 33342                                                | Thermofisher                   | H3570                           |
| MCC950                                                       | Tocris                         | 5479; CAS: 256373-96-3          |
| MRT 68601 hydrochloride                                      | Tocris                         | 5067;<br>CAS: 1190379-37-3      |
| BX 795                                                       | Tocris                         | 4318;<br>CAS: 702675-74-9       |
| MRT 67307 didhydrochloride                                   | Tocris                         | 5134;<br>CAS: 1190378-57-4      |
| Lipofectamine® RNAiMAX Reagent                               | ThermoFisher Scientific        | 13778-150                       |
| ON-TARGETplus TBK1 siRNA 1                                   | Dharmacon/Perkin Elmer         | J-063162-05-0002                |
| ON-TARGETplus TBK1 siRNA 2                                   | Dharmacon/Perkin Elmer         | J-063162-06-0002                |
| ON-TARGETplus TBK1 siRNA 3                                   | Dharmacon/Perkin Elmer         | J-063162-07-0002                |
| ON-TARGETplus TBK1 siRNA 4                                   | Dharmacon/Perkin Elmer         | J-063162-08-0002                |
| ON-TARGETplus PP2A siRNA 1                                   | Dharmacon/Perkin Elmer         | J-040657-05-0002                |
| ON-TARGETplus PP2A siRNA 2                                   | Dharmacon/Perkin Elmer         | J-040657-07-0002                |
| ON-TARGETplus PP2A siRNA 3                                   | Dharmacon/Perkin Elmer         | J-040657-08-0002                |
| ON-TARGETplus Non-targeting siRNA Pool                       | Dharmacon/Perkin Elmer         | D-001810-10-05                  |
| Dynabeads                                                    | ThermoFisher                   | 10003D                          |
| <b>NLRP3 commercial assays</b>                               |                                |                                 |
| Cytox96 nonradioactive cytotoxicity assay                    | Promega                        | G1780                           |
| Serine/Threonine Phosphatase Assay System                    | Promega                        | V2460                           |
| Mouse IL-1 $\beta$ ELISA                                     | eBioscience                    | 88-7013-77                      |

|                                                                                                                         |                                                                                             |                      |
|-------------------------------------------------------------------------------------------------------------------------|---------------------------------------------------------------------------------------------|----------------------|
| Mouse TNF ELISA                                                                                                         | eBioscience                                                                                 | 88-7324-77           |
| Human IL-1 $\beta$ ELISA                                                                                                | eBioscience                                                                                 | 88-7261-77           |
| Mouse IL-18 ELISA                                                                                                       | eBioscience                                                                                 | BMS618-3TEN          |
| Caspase-Glo® 1 Inflammasome Assay                                                                                       | Promega                                                                                     | G9952                |
| <b>Microscopy &amp; PLA reagents</b>                                                                                    |                                                                                             |                      |
| Duolink In Situ Detection Reagents - FarRed                                                                             | Sigma                                                                                       | DUO92013-100RXN      |
| Duolink In Situ PLA probe anti rabbit Minus                                                                             | Sigma                                                                                       | DUO92005-100RXN      |
| Duolink In Situ PLA probe anti mouse Plus                                                                               | Sigma                                                                                       | DUO92001-100RXN      |
| ProLong® Diamond Antifade Mountant with DAPI                                                                            | ThermoFisher                                                                                | P36971               |
| 4-well Chamber Slides                                                                                                   | ThermoFisher                                                                                | 16250661             |
| 8-well Chamber Slides                                                                                                   | ThermoFisher                                                                                | 16260661             |
| <b>Experimental models: cell lines</b>                                                                                  |                                                                                             |                      |
| Platinum-E (PlatE) retroviral packaging cell line                                                                       | eBioscience                                                                                 | RV-101               |
| HEK293T cells                                                                                                           | Sigma Aldrich                                                                               | 12022001-1VL         |
| WT, <i>Tnf</i> <sup>-/-</sup> <i>Tbk1</i> <sup>+/-</sup> and <i>Tnf</i> <sup>-/-</sup> <i>Tbk1</i> <sup>-/-</sup> BMDMs | Gift from Prof Cevayir Coban and Prof Michelle Lee Sue Jann<br>University of Tokyo          |                      |
| ASC-mCherry iBMDMs                                                                                                      | Gift from Dr David Brough,<br>University of Manchester                                      |                      |
| WT iBMDMs                                                                                                               | Gift from Prof Jonathan Kagan, Harvard University                                           |                      |
| IKK $\epsilon$ KO iBMDMs                                                                                                | Gift from Prof Jonathan Kagan, Harvard University                                           |                      |
| WT THP1 dual cell line                                                                                                  | Invivogen                                                                                   | thpd-nfis            |
| TBK1 KO THP1 dual cell line                                                                                             | Invivogen                                                                                   | thpd-kotbk           |
| <b>Experimental models: organisms/strains</b>                                                                           |                                                                                             |                      |
| C57BL/6J mice                                                                                                           | Charles River                                                                               | RRID:IMSR_JAX:000664 |
| B6.NLRP3 KO mice                                                                                                        | Kevin Maloy lab, originally from Vishva Dixit (Genentech) strain B6.NLRP3 <sup>tm1Vmd</sup> | RRID:MGI:5468973     |
| <b>Primers used for cloning</b>                                                                                         |                                                                                             | <b>Sequence</b>      |
| NLRP3 S3A Forward                                                                                                       | TTACTCCAATTGGCCACCATGACGGCTGTCCGT<br>TGCAAGCTG                                              |                      |
| NLRP3 S3A Reverse                                                                                                       | GAGTAACTCGCGGCCGCCCCAGGAAATCTCGA<br>AGACTATAGT                                              |                      |

|                                                                                                       |                                                                 |                  |
|-------------------------------------------------------------------------------------------------------|-----------------------------------------------------------------|------------------|
| NLRP3 S3D Forward                                                                                     | TTACTCCAATTGGCCACCATGACGGATGTCCGT<br>TGCAAGCTG                  |                  |
| NLRP3 S3D Reverse                                                                                     | GAGTAACTCGCGGCCGCCCCAGGAAATCTCGA<br>AGACTATAGT                  |                  |
| <b>Recombinant DNA</b>                                                                                |                                                                 |                  |
| pMIGRMCS retroviral packaging plasmid expressing GFP and FLAG-tag                                     | Kate Schroder lab                                               | N/A              |
| pMIGRMCS retroviral packaging plasmid expressing GFP and FLAG-tagged WT NLRP3, S3A NLRP3 or S3D NLRP3 | Bezbradica lab (Full sequence available on request)             | N/A              |
| pcDNA3.1 mammalian expression Vector containing FLAG-tagged mouse WT, S3A or S3D NLRP3                | VectorBuilder, Michigan, USA                                    | N/A              |
| pcDNA3.1 mammalian expression Vector containing HA-tagged mouse TBK1                                  | VectorBuilder, Michigan, USA                                    | N/A              |
| <b>Software and Algorithms</b>                                                                        |                                                                 |                  |
| GraphPad Prism                                                                                        | <a href="http://www.graphpad.com/">http://www.graphpad.com/</a> | RRID: SCR_002798 |
| FlowJo                                                                                                | <a href="https://www.flowjo.com/">https://www.flowjo.com/</a>   | RRID: SCR_008520 |
| Fiji                                                                                                  | <a href="https://fiji.sc/">https://fiji.sc/</a>                 | RRID: SCR_002285 |
